# Supplementary material for: Association of one-point glucocorticoid-free status with chronic damage and disease duration in systemic lupus erythematosus: a cross-sectional study
Source: PubMed Central journal article supplement — Lupus Sci Med. 2022 Sep 27;9(1):e000772. doi: 10.1136/lupus-2022-000772 (PMC9516281; doi:10.1136/lupus-2022-000772), 2022-09-27
Supplement: lupus-2022-000772supp002.pdf [file lupus-2022-000772supp002.pdf]

**Supplementary Table 1.** The proportions of each item of SLICC-DI among different disease durations

|                                  | < 5 years<br>(n = 233) | 5 - 20 years<br>(n = 468) | >20 years<br>(n = 246) | <i>p</i> -value |
|----------------------------------|------------------------|---------------------------|------------------------|-----------------|
| Ocular, n (%)                    | 24 (10.3)              | 77 (16.5)                 | 79 (32.1)              | <0.001          |
| Neuropsychiatric, n (%)          | 17 (7.3)               | 63 (13.5)                 | 30 (12.2)              | 0.053           |
| Renal, n (%)                     | 28 (12.0)              | 46 (9.8)                  | 55 (22.4)              | <0.001          |
| Pulmonary, n (%)                 | 22 (9.4)               | 26 (5.6)                  | 14 (5.7)               | 0.12            |
| Cardiovascular, n (%)            | 9 (3.9)                | 19 (4.1)                  | 27 (11.0)              | <0.001          |
| Peripheral vascular, n (%)       | 4 (1.7)                | 23 (4.9)                  | 23 (9.3)               | <0.001          |
| Gastrointestinal, n (%)          | 3 (1.3)                | 18 (3.8)                  | 8 (3.3)                | 0.18            |
| Musculoskeletal, n (%)           | 19 (8.2)               | 60 (12.8)                 | 60 (24.4)              | <0.001          |
| Skin, n (%)                      | 19 (8.2)               | 33 (7.1)                  | 23 (9.3)               | 0.55            |
| Premature gonadal failure, n (%) | 3 (1.3)                | 12 (2.6)                  | 7 (2.8)                | 0.47            |
| Diabetes, n (%)                  | 6 (2.6)                | 30 (6.4)                  | 22 (8.9)               | 0.014           |
| Malignancy, n (%)                | 5 (2.1)                | 16 (3.4)                  | 9 (3.7)                | 0.58            |

SLICC-DI, Systemic Lupus International Collaborating Clinics Damage Index.
