# Supplementary figures and images for: Association of one-point glucocorticoid-free status with chronic damage and disease duration in systemic lupus erythematosus: a cross-sectional study
Source: PubMed Central journal article supplement — Lupus Sci Med. 2022 Sep 27;9(1):e000772. doi: 10.1136/lupus-2022-000772 (PMC9516281; doi:10.1136/lupus-2022-000772), 2022-09-27

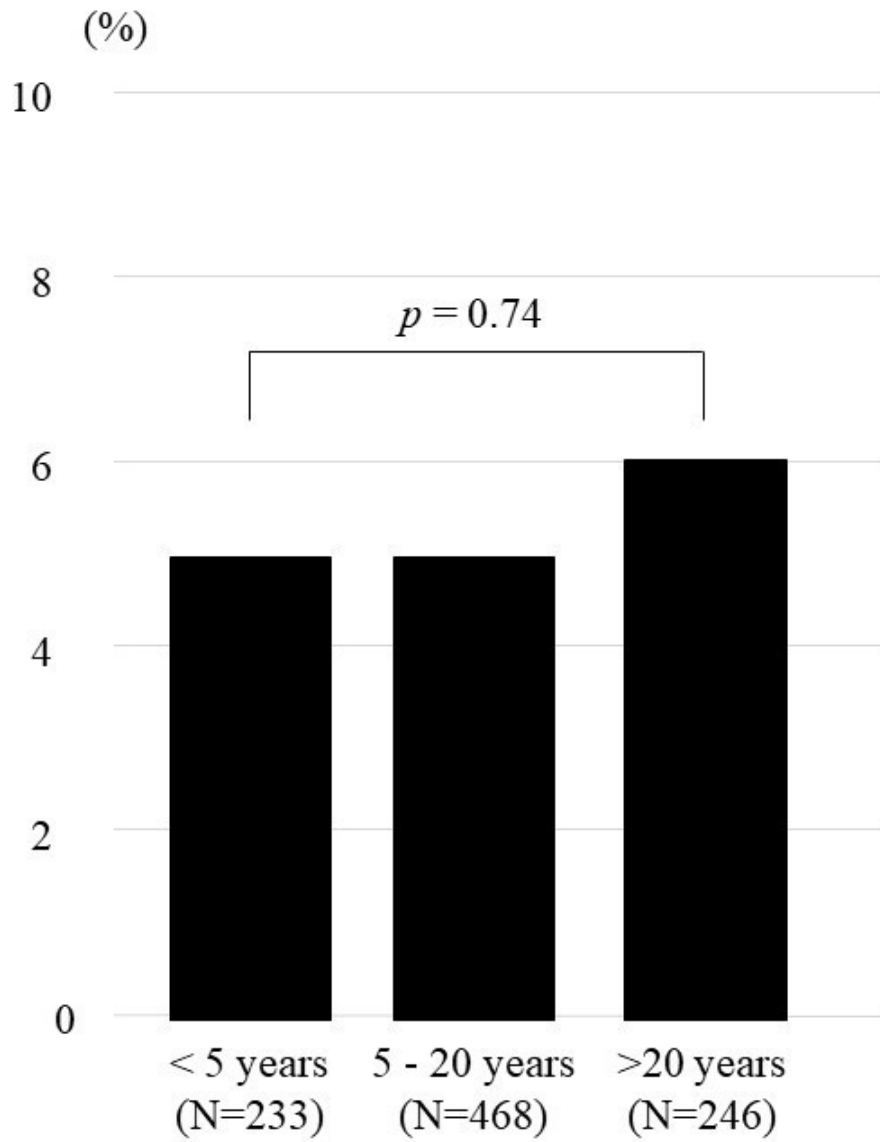

Supplement: lupus-2022-000772supp001.pdf [file lupus-2022-000772supp001.pdf]
